# Supplementary material for: miR-144/451 represses the LKB1/AMPK/mTOR pathway to promote red cell precursor survival during recovery from acute anemia
Source: PubMed Central journal article supplement — Haematologica. 2017 Dec 21;103(3):406–16. doi: 10.3324/haematol.2017.177394 (PMC5830375; doi:10.3324/haematol.2017.177394), 2018-03
Supplement: 2017_177394-Disclosures_and_Contributions.pdf [file 2017_177394-Disclosures_and_Contributions.pdf]

Haematologica  
HAEMATOL/2017/177394  
Version 3

miR-144/451 represses the LKB1/AMPK/mTOR pathway to promote red cell precursor survival during recovery from acute anemia

Xiao Fang, Feiyang Shen, Christophe Lechauve, Peng Xu, Guowei Zhao, Jacobi Itkow, Fan Wu, Yaying Hou, Xiaohui Wu, Lingling Yu, Huiqing Xiu, Mengli Wang, Ruiling Zhang, Fangfang Wang, Yanqing Zhang, Daxin Wang, Mitchell J Weiss, and Duonan Yu

Disclosures: The authors declare no competing financial interests.

Contributions: F.X., S.F., L.C., X.P., Z.G., I.J., W.F., H.Y., W.X., Y.L., X.H., W.M., Z.R., W.F., Z.Y. and W.D. conducted the experiments; F.X., W.M.J. and Y.D. designed the experiments; Y.D. wrote the paper, and W.M. revised the manuscript.
